# Supplementary material for: A common regulatory haplotype doubles lactoferrin concentration in milk
Source: Springer Nature journal article supplement (doi:10.1186/s12711-024-00890-x), 2024-03-28

Distribution of milk Lf concentration at peak lactation

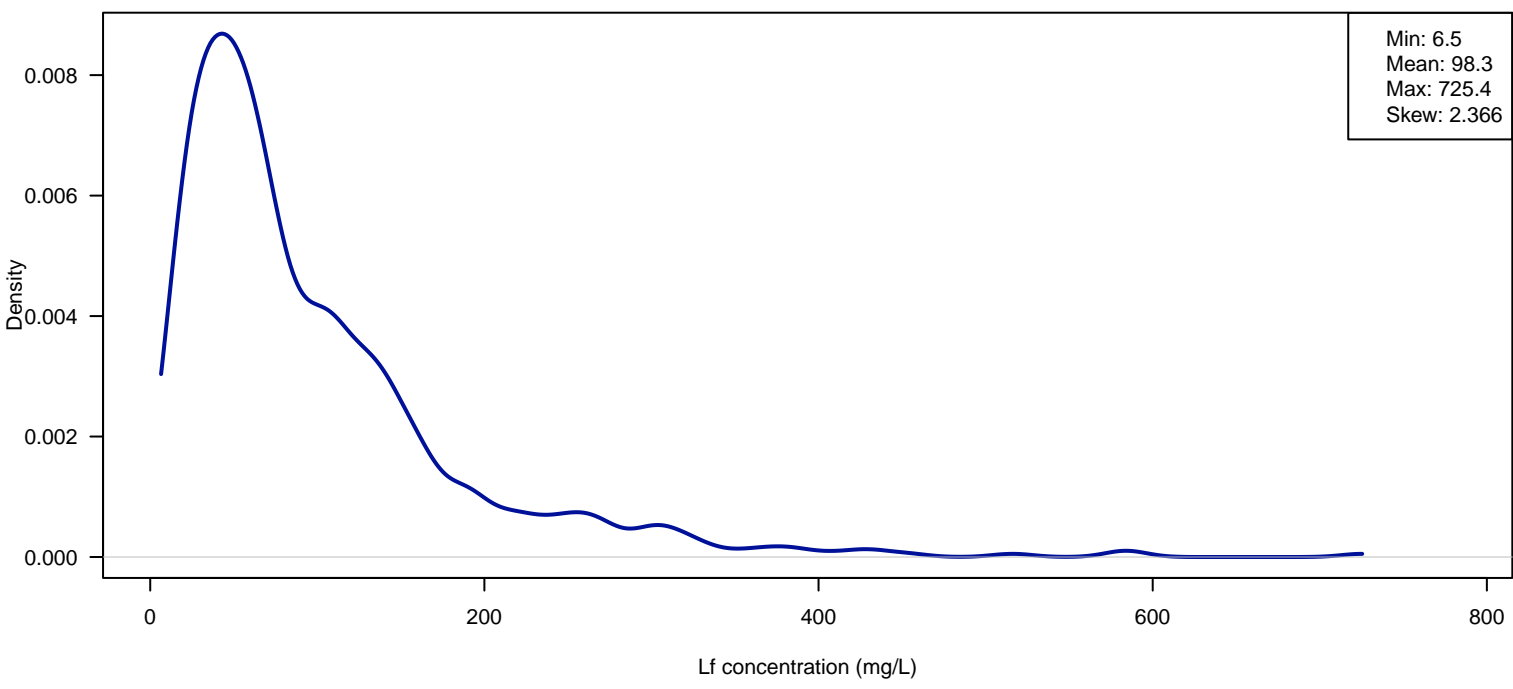

Distribution of milk Lf concentration at mid lactation

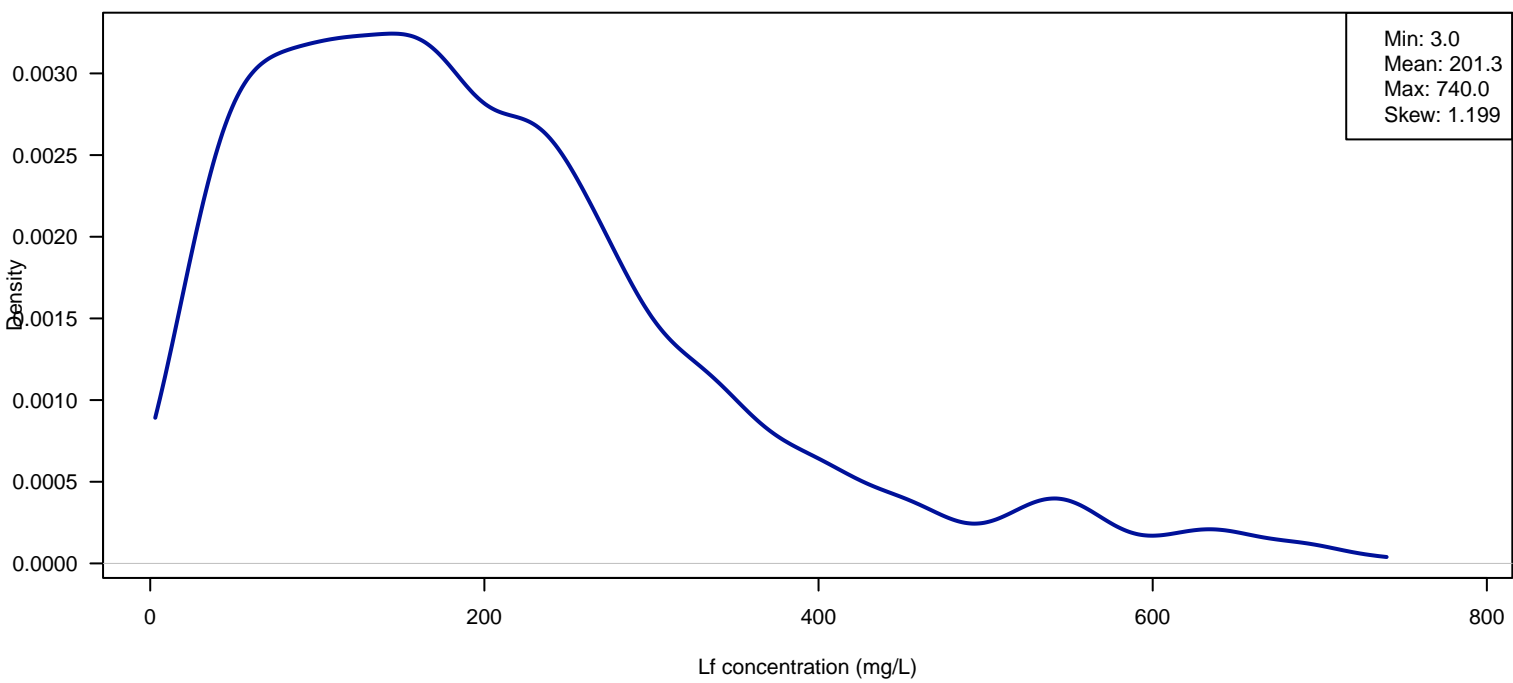

Distribution of milk Lf concentration at late lactation

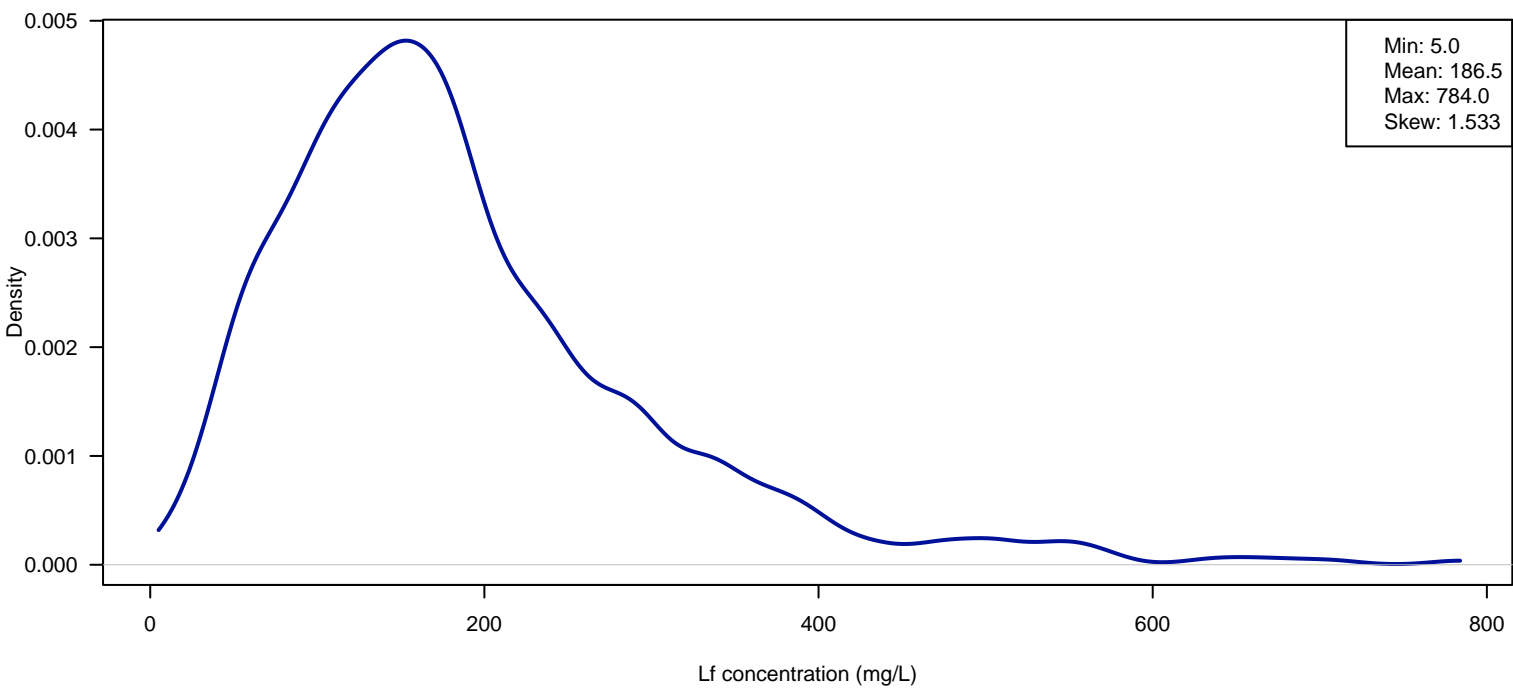

Distribution of milk Lf concentration aggregate phenotype

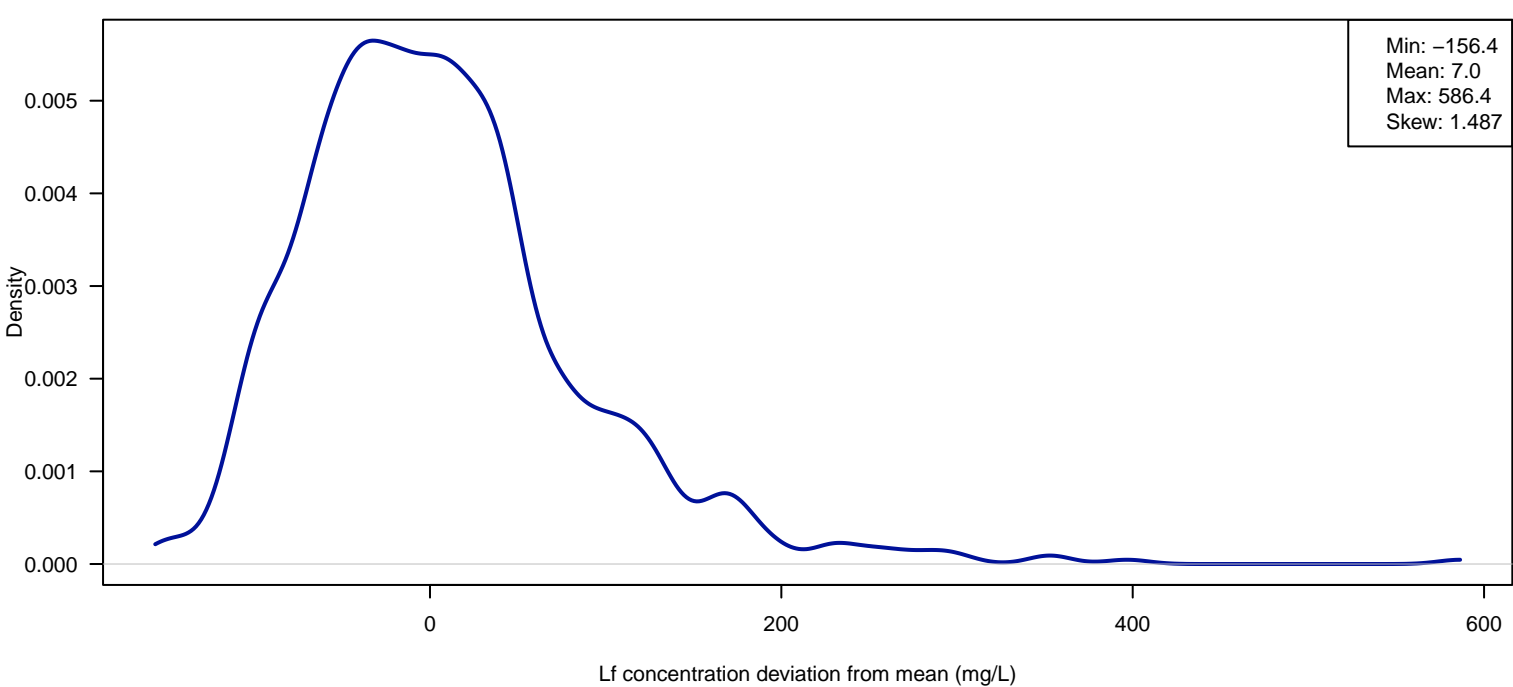

Distribution of log-scaled milk Lf concentration at peak lactation

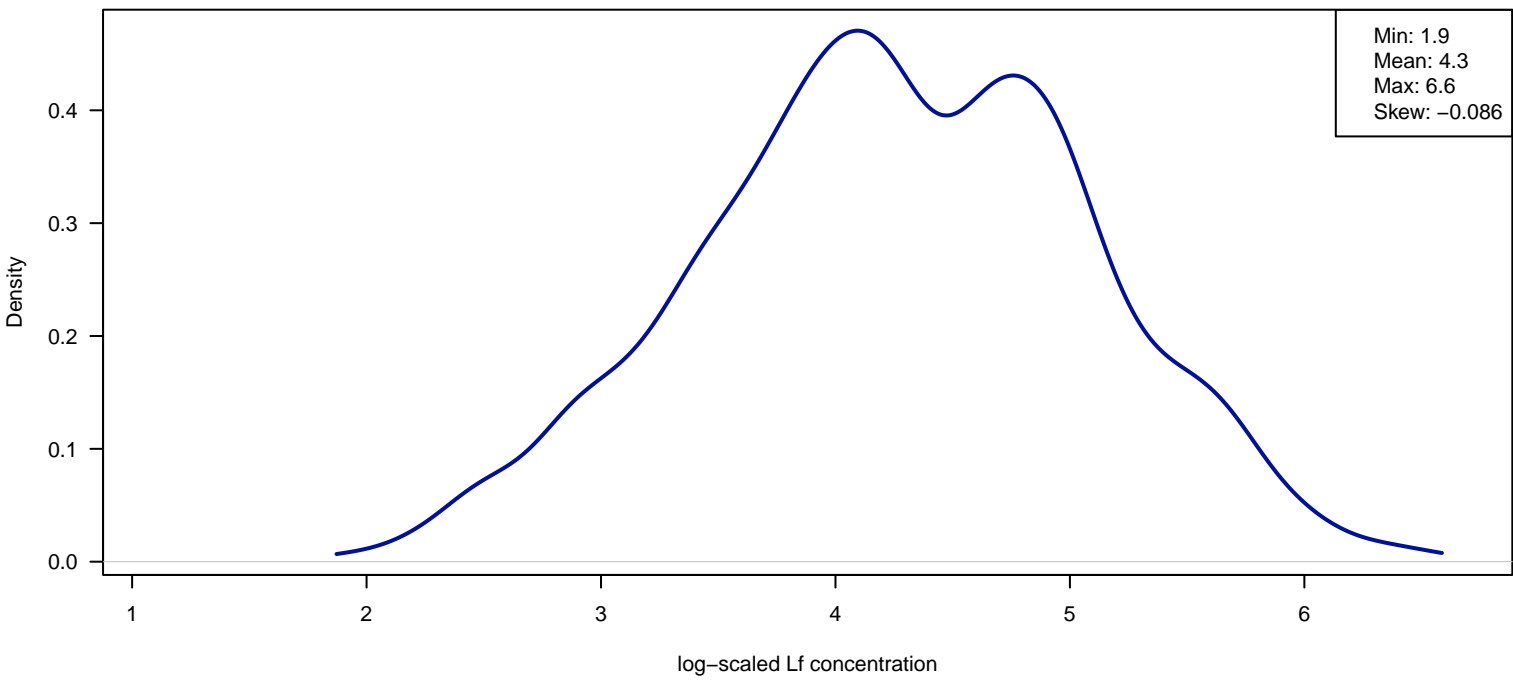

Distribution of log-scaled milk Lf concentration at mid lactation

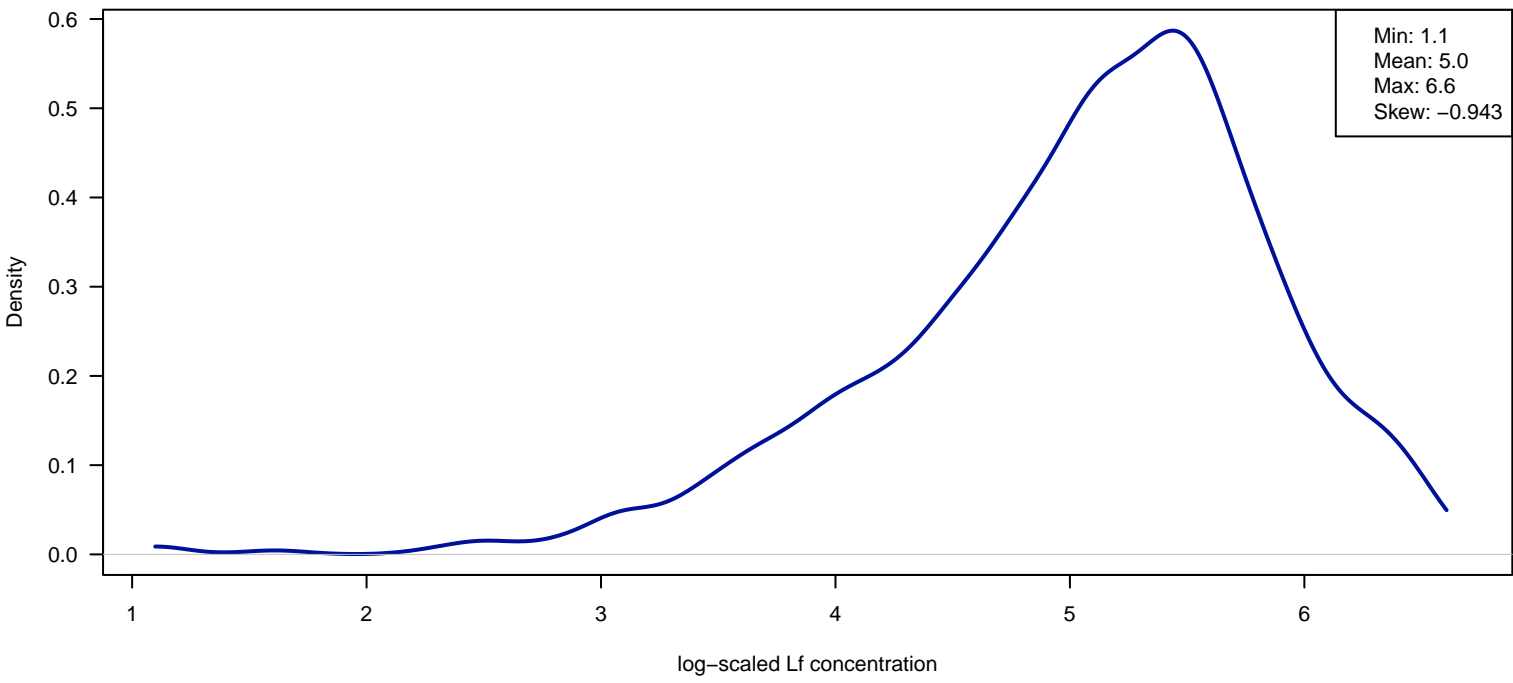

Distribution of log-scaled milk Lf concentration at late lactation

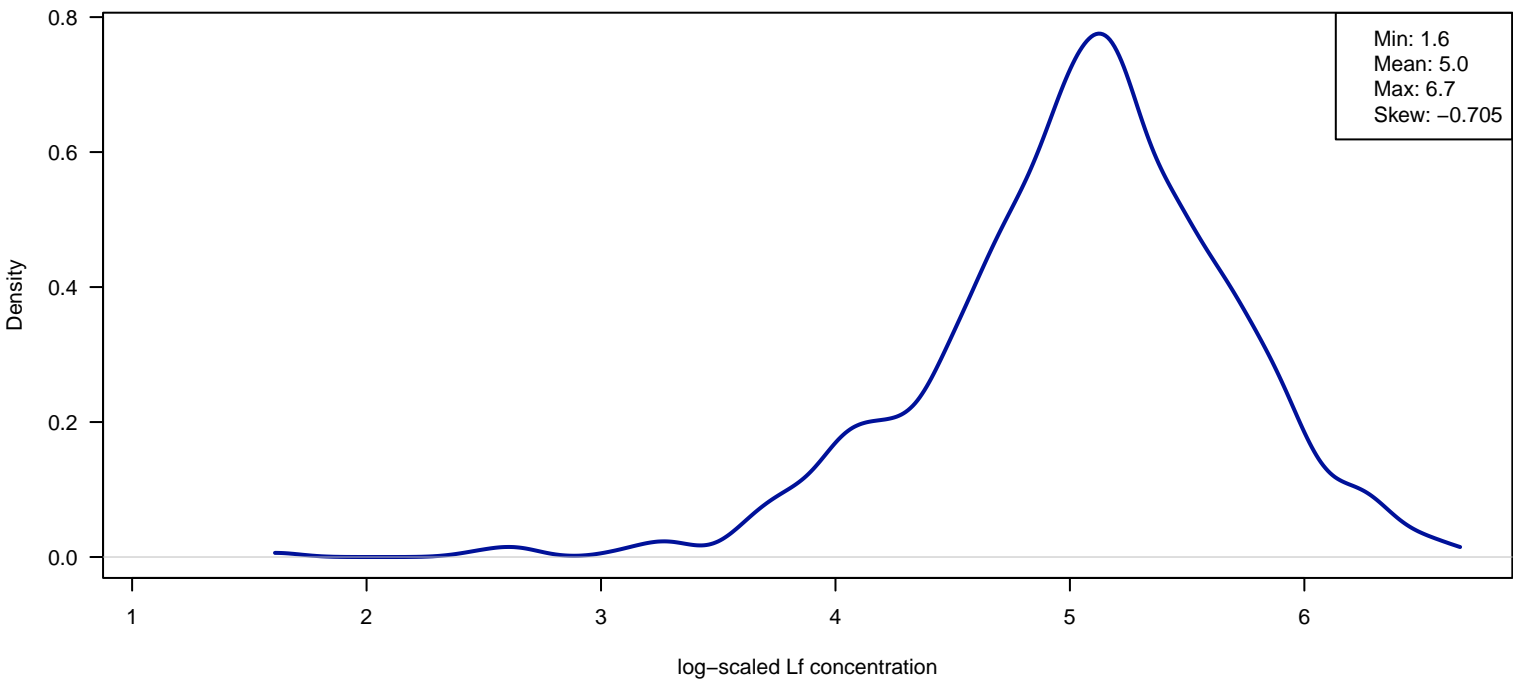

Supplement: MOESM2 [file 12711_2024_890_MOESM2_ESM.pdf]
